# Supplementary material
Source: publisher site journal article supplement (http://www.degruyter.com/publication/journal_key/APJRI/downloadAsset/APJRI_CMS_authordate%20Reference%20Style%20Sheet.pdf)
Supplement: Supplementary file 1 [file APJRI_CMS_authordate%20Reference%20Style%20Sheet.pdf]

# REFERENCE STYLE CHICAGO MANUAL OF STYLE *author date*

## In-text citation

|                     |                                                                                                 |
|---------------------|-------------------------------------------------------------------------------------------------|
| Direct              | Parentheses ( ), e.g. "... in their research Grazer and Fishman (2015, p. 12) assert ..."       |
| Indirect            | Parentheses ( ), e.g. "... the darkest days were still ahead (Grazer and Fishman 2015, p. 12)." |
| More than 3 authors | First author is listed, followed by <i>et al.</i>                                               |

## Journal and articles

|                           |                                                                                                                                                                                                                                                                                                                 |
|---------------------------|-----------------------------------------------------------------------------------------------------------------------------------------------------------------------------------------------------------------------------------------------------------------------------------------------------------------|
| Journal article           | Bay, Rachael A., Noah Rose, Rowan Barrett, Louis Bernatchez, Cameron K. Ghalambor, Jesse R. Lasky, Rachel B. Brem, Stephen R. Palumbi and Peter Ralph. 2017. "Predicting Responses to Contemporary Environmental Change Using Evolutionary Response Architectures." <i>American Naturalist</i> 189 (5): 463-73. |
| More than 10 authors      | First 7 authors are listed, followed by <i>et al.</i>                                                                                                                                                                                                                                                           |
| Journal article with DOI  | Keng, Shao-Hsun, Chun-Hung Lin and Peter F. Orazem. 2017. "Expanding College Access in Taiwan, 1978–2014: Effects on Graduate Quality and Income Inequality." <i>Journal of Human Capital</i> 11 (1): 1-34. <a href="https://doi.org/10.1086/690235">https://doi.org/10.1086/690235</a> .                       |
| Journal article in suppl. | Agha, Asif. 2015. "Tropes of Branding in Forms of Life." <i>Signs and Society</i> 3 (S1): 174-94. <a href="https://doi.org/10.1086/679004">https://doi.org/10.1086/679004</a> .                                                                                                                                 |

## Books and chapters

|                       |                                                                                                                                                                                                                                                                                      |
|-----------------------|--------------------------------------------------------------------------------------------------------------------------------------------------------------------------------------------------------------------------------------------------------------------------------------|
| Book (authored)       | Meyer, Brian and Charles Fishman. 2015. <i>A Curious Mind: The Secret to a Bigger Life</i> . New York: Simon & Schuster.                                                                                                                                                             |
| Book (edited) chapter | Nhoreau, Henry David. 2016. "Walking." In <i>The Making of the American Essay</i> , edited by John D'Agata, 167–95. Minneapolis: Graywolf Press.                                                                                                                                     |
| Book online           | Piosik, Michał, Janusz Taborek and Marta Woźnicka, eds. 2021. <i>Korpora in der Lexikographie und Phraseologie</i> . Lexicographica. Series Major, Vol. 160. Berlin, Boston: De Gruyter. <a href="https://doi.org/10.1515/9783110716955">https://doi.org/10.1515/9783110716955</a> . |

## Databases and websites

|          |                                                                                                                                                                                                                                                                                                                                                             |
|----------|-------------------------------------------------------------------------------------------------------------------------------------------------------------------------------------------------------------------------------------------------------------------------------------------------------------------------------------------------------------|
| Database | Milberger, Sharon. 2002. <i>Evaluation of Violence Against Women With Physical Disabilities in Michigan, 2000–2001</i> . ICPSR version. Detroit: Wayne State University. Distributed by Ann Arbor, MI: Inter-University Consortium for Political and Social Research. <a href="https://doi.org/10.3886/ICPSR03414">https://doi.org/10.3886/ICPSR03414</a> . |
| Website  | Evstatieva, Monika. 2020. "Anatomy of a COVID-19 Conspiracy Theory." <i>NPR All Things Considered</i> . <a href="https://www.npr.org/2020/07/10/889037310/anatomy-of-a-covid-19-conspiracy-theory">https://www.npr.org/2020/07/10/889037310/anatomy-of-a-covid-19-conspiracy-theory</a> (accessed January 7, 2021).                                         |

*Reference list entries in alphabetical order*
